# Supplementary material
Source: publisher figshare collection journal article supplement (https://acs.figshare.com/ndownloader/files/14602034)
Supplement: Supplementary file 1 [file 14602034]

---

1 **Supporting Information for**  
2 **Inflammation response of water-soluble fractions in atmospheric fine**  
3 **particulates: a seasonal observation in 10 large Chinese cities**

4  
5 Huimin Ma<sup>a,b</sup>, Jun Li<sup>a</sup>, Cong Wan<sup>a,c</sup>, Yaohui Liang<sup>a,c</sup>, Xiangyun Zhang<sup>a</sup>, Guanghui Dong<sup>d</sup>, Liwen  
6 Hu<sup>d</sup>, Boyi Yang<sup>d</sup>, Xiaowen Zeng<sup>d</sup>, Tao Su<sup>a,c</sup>, Shaoyou Lu<sup>e</sup>, Shejun Chen<sup>a</sup>, Mahdi Safaei Khorram<sup>a</sup>,  
7 Guoying Sheng<sup>a</sup>, Xinming Wang<sup>a</sup>, Bixian Mai<sup>a</sup>, Zhiqiang Yu<sup>a\*</sup>, Gan Zhang<sup>a\*</sup>

8  
9 <sup>a</sup>State Key Laboratory of Organic Geochemistry and Guangdong province Key Laboratory of  
10 Environmental Protection and Resources Utilization, Guangzhou Institute of Geochemistry,  
11 Chinese Academy of Sciences, Guangzhou 510640, China

12 <sup>b</sup>Lancaster Environmental Centre, Lancaster University, LA1 4YQ Lancaster, United Kingdom

13 <sup>c</sup>University of Chinese Academy of Sciences, Beijing 100049, China

14 <sup>d</sup>Department of Preventive Medicine, School of Public Health, Sun Yat-sen University, Guangzhou  
15 510080, China

16 <sup>e</sup>Shenzhen Center for Disease Control and Prevention, Shenzhen, 518055, China

17

18 **Corresponding authors:**

19 Name: Gan Zhang, E-mail: [zhanggan@gig.ac.cn](mailto:zhanggan@gig.ac.cn)

20 Zhiqiang Yu, E-mail: [zhiqiang@gig.ac.cn](mailto:zhiqiang@gig.ac.cn)

21 Address: State Key Laboratory of Organic Geochemistry and Guangdong province  
22 Key Laboratory of Environmental Protection and Resources Utilization, Guangzhou  
23 Institute of Geochemistry, Chinese Academy of Sciences, Guangzhou 510640, China

24

25  
26  
27  
28  
29  
30  
31  
32  
33  
34  
35  
36  
37  
38  
39  
40  
41  
42  
43  
44  
45

---

**Tables:**

Table S1 : The primers used in this study.

Table S2: Concentrations of PM<sub>2.5</sub> samples from 10 large cities in China collected during 1 year.

Table S3: Characteristics of HULIS and the NMR groups in the WSFs of PM<sub>2.5</sub>.

Table S4: PCA results of the water-soluble inorganic ions, water-soluble elements, PM<sub>2.5</sub>, and WSOC.

**Figures:**

Figure S1. IL-6 response in A549 cells exposed to the dichloromethane (DCM) and WSF of PM<sub>2.5</sub> samples from the same volume of air.

Figure S2. Confirmation of PM<sub>2.5</sub> induced IL-6 release.

Figure S3. Relative IL-6 response in A549 cells exposed to various concentrations of Pb.

Figure S4. Relative IL-6 response of humic-like substances (HULIS), non-HULIS, and the WSFs of PM<sub>2.5</sub> samples.

Figure S5. The DNA methylation inhibitor 5-aza-2'-deoxycytidine (AZA) enhanced PM<sub>2.5</sub>-induced IL-6 release in A549 cells.

Figure S6. Relative DNA methylation of 22 tumor-related genes in A549 cells exposed to the WSF of Xinxiang Spring (XXSP) PM<sub>2.5</sub>.

---

46

47

48 **Supporting Methods:**

49

50 ***S1-1: WSF extraction, DCM fraction extraction:***

51 The WSF extraction was performed as follows: each PM<sub>2.5</sub> sample was cut into  
52 the pieces, dissolved in 5 mL of deionized water, and sonicated for 15 min. After  
53 treating three times, the suspension was filtered through 0.22- $\mu$ m  
54 polytetrafluoroethylene syringe filters (Millipore, Billerica, MA, USA). Finally,  
55 samples were freeze-dried and dissolved in deionized water up to 50,000 PPM for  
56 storage liquid and they will be diluted to different concentrations in different  
57 experiments. A blank filter was treated using the same method as the method blank.

58 *Dichloromethane (DCM) fraction of PM<sub>2.5</sub> extraction:* The DCM fraction was  
59 extracted from PM<sub>2.5</sub> samples collected in GZ in 2013 (GZ W1 and GZ W2). PM<sub>2.5</sub>  
60 samples were collected from the combustion products of core stalks, coal, and vehicle  
61 exhaust. The filters were then extracted with DCM using pressurized liquid extraction  
62 (ASE300; Dionex Corp., Sunnyvale, CA, USA) for 2 days. Finally, the extracts were  
63 gently evaporated and dried under nitrogen gas and reconstituted with dimethyl  
64 sulfoxide to various concentrations.

65

66 ***S1-2 : Inorganic chemical analyses***

67 Water-soluble inorganic ions: A Metrosep C4-100 (Metrohm) column and  
68 Metrosep Supp 5 - 150 (Metrohm) column were used to separate the cations and  
69 anions, respectively. Buffer 1 (2 mmol/L H<sub>2</sub>SO<sub>4</sub>) and buffer 2 (3.2 mmol/L Na<sub>2</sub>CO<sub>3</sub>  
70 and 1.0 mmol/L NaHCO<sub>3</sub>) were used as the elution and balance buffers for the cations

---

71 and anions, respectively. The detection limits of all ions were 0.01 µg/mL. Fresh  
72 deionized water was injected thrice before each standard (Sigma-Aldrich, St. Louis,  
73 MO, USA) and sample injection to minimize cross-contamination.

74 Metal elements : The detection limits for the analyzed metals were as follows: Al  
75 (6 µg/L), Ti (6 µg/L), V (0.7 µg/L), Cr (0.9 µg/L), Mn (0.6 µg/L), Fe (9 µg/L), Co (0.3  
76 µg/L), Ni (0.7 µg/L), Zn (9 µg/L), Cu (0.9 µg/L), As (0.9 µg/L), Cd (0.6 µg/L), and Pb  
77 (0.7 µg/L) (Naimabadi et al., 2016).

78

79

80 ***S1-3: HULIS fractions analysis:***

81 To separate HULIS from the WSF of PM<sub>2.5</sub>, sample solutions were diluted to 20  
82 mL and the pH was adjusted to 2. HULIS was separated using a 6-mL Oasis HLB  
83 column (Waters, Milford, MA, USA), in which 4 mL of methanol and 5 mL of  
84 deionized water (pH = 2) were added to activate the column, followed by the addition  
85 of the prepared sample. After adsorption, 2 mL of deionized water was added to the  
86 column to remove not absorbed organic and inorganic components therein. The  
87 column was freeze dried followed by the addition of 3 mL of 2% (v/v)  
88 ammonia/methanol (Sigma-Aldrich) to the column in order to elute the absorbed  
89 target compounds. The elution step was repeated once, the eluted solution was dried  
90 under a stream of liquid nitrogen and water was added to a constant volume up to 20  
91 mL. The carbon content of HULIS was analyzed with a TOC analyzer.

92

93 ***S1-4: Cell treatment, DNA methylation and gene expression:***

94 The treatment of cells:

95 A549 and Beas-2B cells were purchased from the Cell Bank of Type Culture

---

96 Collection of Chinese Academy of Sciences (Shanghai, China). A549 cells were  
97 cultured in RPMI 1640 with 10% FBS (v/v) at 37 °C in a 5% CO<sub>2</sub> atmosphere, and  
98 Beas-2B cells were cultured in high-glucose Dulbecco's modified Eagle's medium  
99 (Hyclone, Logan, UT, USA) supplemented with 10% (v/v) fetal bovine serum (FBS;  
100 Gibco, San Diego, CA, USA). All WSF samples were sonicated for about 20 seconds  
101 before use to expose cells.

102 Concentrations conversion:

103 In this study, the ability of IL-6 release induced by WSF samples between ten  
104 cities and four seasons was used to be compared, so WSF samples from same volume  
105 air, 10 m<sup>3</sup> air, was used to expose cells which make this comparison reasonable.  
106 Normally, PM<sub>2.5</sub> toxicity experiments prefer to use µg/cm<sup>2</sup> unite to express the exposure  
107 concentration in *in vitro* experiments, which is try to simulate human respiratory  
108 exposed PM<sub>2.5</sub>. Because the A549 and Beas-2B were the adherent cells, the area of cells  
109 culture plate was recorded for calculate cell exposure concentrations in µg/cm<sup>2</sup> unite.  
110 The mass of PM<sub>2.5</sub> in 10 m<sup>3</sup> air was calculated using PM<sub>2.5</sub> data (µg/m<sup>3</sup>), then the cell  
111 exposure concentrations (µg/cm<sup>2</sup>) of each sample was calculated as the rate of mass of  
112 PM<sub>2.5</sub> to cells area.

113 DNA methylation PCR array:

114 The DNA methylation PCR array, which included 22 tumor-related genes (*APC*,  
115 *CADMI (TSLC1)*, *CDKN1C (p57Kip2)*, *CDKN2A*, *CDKN2B (p15INK4b)*, *FHIT*,  
116 *CDH1*, *CDH13*, *DLC1*, *OPCML (aOBCAM)*, *FHIT*, *MLH1*, *PRDM2 (RIZ1)*, *RASSF1*,  
117 *RASSF2*, *TCF21*, *CXCL12*, *APBA1*, *MGMT (AGT)*, *CYP1B1*, *PAX5*, and *MTHFR*)  
118 exhibiting DNA methylation dysregulation, might be associated with various lung  
119 diseases, was used to screen for genes targeted for DNA methylation after exposure to  
120 the WSF of PM<sub>2.5</sub>.

---

121 *RASSF2 and CYP1B1 gene methylation:*

122 The Sequenom MassARRAY platform (Sequenom) was used to perform the  
123 quantitative methylation analysis of the *RASSF2* and *CYP1B1* genes. The primers  
124 were designed using Sequenom software (<http://www.epidesigner.com>) and described  
125 in detail in our previous paper<sup>1</sup> (Supplemental Table 1). We examined a 568-bp  
126 fragment of *CYP1B1* (GRch38, Chr2, 38074550–38075117) and a 539-bp fragment of  
127 *RASSF2* (GRch38, Chr20, 4823013–4823551); these included 65 CpG sites and 58  
128 CpG sites, of which 48 and 30 CpG sites were detected, respectively. These two  
129 fragments are involved in CpG islands considered to participate in gene expression.  
130 The DNA methylation level of each CpG site was expressed as the mean of the  
131 methylated sites ratio to the sum of methylated and unmethylated sites, and DNA  
132 methylation degree of the two genes was calculated as the average of all sites.

133 *LINE-1 and iNOS gene methylation:*

134 Genomic DNA was bisulfited using a bisulfite conversion kit (Zymo Research,  
135 Orange, CA, USA). The DNA methylation level of *iNOS* has been reported to be  
136 negatively related to gene expression<sup>2</sup>. *LINE-1* gene methylation was expressed as the  
137 methylated sites divided by the sum of methylated and unmethylated sites, and the  
138 relative DNA methylation was the degree of methylation compared with that of blank  
139 samples, which was considered as 100%.

140 Gene expression:

141 Briefly, total cellular RNA was extracted using TRIzol Reagent (Invitrogen,  
142 Carlsbad, CA, USA) and 2 µg of total RNA from each sample was reverse-transcribed  
143 into cDNA using a Prime-Script™ RT Reagent Kit (TaKaRa, Dalian, China). The  
144 levels of the target gene mRNA transcripts relative to control β-actin were characterized  
145 by quantitative PCR using the cDNA template, specific primers (Excel Table S1), and

---

146 SYBR® Premix Ex Taq™ (TaKaRa) on an AB 7500 Fast System (Applied Biosystems,  
147 Foster City, CA, USA). Supplementary Table 1 lists the sequences of the primers used  
148 in this experiment. The levels of the target mRNA transcripts relative to control  $\beta$ -actin  
149 were analyzed with the  $2^{\Delta\Delta C_t}$  method and expressed as fold changes.

150

151  
152  
153  
154

**Supplemental Tables and Figures:**

Table S1. The primers used in this study.

| <b>MassARRAY</b>             | Gene Name                                                 |
|------------------------------|-----------------------------------------------------------|
|                              | <i>cyp1b1</i>                                             |
| Forward primer<br>(5'–3')    | aggaagagagGTTGTTTTATAGTGGTGTGGAATGG                       |
| Reverse primer<br>(5'–3')    | cagtaatcagactcactatagggagaagctCAATACCTCAAAAACCTTATCCAAAAT |
|                              | <i>rassf2</i>                                             |
| Forward primer<br>(5'–3')    | aggaagagagGGTTGAAAAGGTTAAGGGGTT                           |
| Reverse primer<br>(5'–3')    | cagtaatcagactcactatagggagaagctCAATACCTCAAAAACCTTATCCAAAAT |
| <b>Pyrosequencing</b>        |                                                           |
|                              | <i>LINE-1</i>                                             |
| Forward primer<br>(5'–3')    | TTTTGAGTTAGGTGTGGGATATA                                   |
| Sequencing<br>primer (5'–3') | AGTTAGGTGTGGGATATAGT                                      |
| Reverse primer<br>(5'–3')    | Biotin-AAAATCAAAAATTCCTTTC                                |
| Sequence<br>analyzed         | CTCGTGGTGCGCCGTTTTTTAAGCCGTCGGAAAGCGC                     |
|                              | <i>iNOS</i>                                               |
| Forward primer<br>(5'–3')    | AATGAGAGTTGTTGGGAAGTGTTT                                  |
| Sequencing<br>primer (5'–3') | TAAAGGTATTTTTGTTTTAA                                      |
| Reverse primer<br>(5'–3')    | Biotin-CCACCAAACCCAACCAAACCT                              |
| Sequence<br>analyzed         | C/TGATTTTC/TGGGTTTTTT                                     |
| <b>Real-time PCR</b>         |                                                           |
|                              | <i>cyp1b1</i>                                             |
| Forward primer<br>(5'–3')    | TGAGTGCCGTGTGTTTCGG                                       |
| Reverse primer<br>(5'–3')    | GTTGCTGAAGTTGCGGTTGAG                                     |



---

*rassf2*  
Forward primer  
(5'–3') GCACTCTGGCTGTAACCTGG  
Reverse primer  
(5'–3') CACTAGGCGTCCTCACATTGC

*IL-6*  
Forward primer  
(5'–3') ACTCACCTCTTCAGAACGAATTG  
Reverse primer  
(5'–3') CCATCTTTGGAAGGTTTCAGGTTG

*IL-8*  
Forward primer  
(5'–3') TTTTGCCAAGGAGTGCTAAAGA  
Reverse primer  
(5'–3') AACCTCTGCACCCAGTTTTC

---

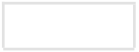

155

156

157 Table S2. Concentrations of 24h PM<sub>2.5</sub> from 10 large cities in China collected during 1  
 158 year.

| PM <sub>2.5</sub> concentration <sup>a</sup> | Median | Mean±SD      | * <i>p</i> value |
|----------------------------------------------|--------|--------------|------------------|
| TY                                           | 331.70 | 303.15±34.35 | <i>p</i> = 0.003 |
| LZ                                           | 249.35 | 270.92±30.41 |                  |
| XX                                           | 243.60 | 236.2±47.91  |                  |
| GY                                           | 206.93 | 206.93±13.9  |                  |
| BJ                                           | 202.56 | 189.2±22.8   |                  |
| WH                                           | 161.45 | 187.74±43.58 |                  |
| CD                                           | 138.34 | 156.81±39.01 |                  |
| NJ                                           | 105.12 | 99.73±29.33  |                  |
| SH                                           | 82.00  | 86.39±36.05  |                  |
| GZ                                           | 81.94  | 80.73±25.03  |                  |
| Spring                                       | 140.37 | 181.64±57.44 | <i>p</i> = 0.184 |
| Summer                                       | 128.16 | 132.8±62.03  |                  |
| Autumn                                       | 156.63 | 165.2±45.47  |                  |
| Winter                                       | 205.06 | 229.63±47.11 |                  |

\*Kruskal–Wallis test. <sup>a</sup>µg/m<sup>3</sup>.

159 TY, Taiyuan; LZ, Lanzhou; XX, Xinxiang; GY, Guiyang; BJ, Beijing; WH, Wuhan;  
 160 CD, Chengdu; NJ, Nanjing; SH, Shanghai; GZ, Guangzhou

161  
 162

163  
164  
165  
166  
167

Table S3. Characteristics of HULIS and the NMR groups in the WSFs of PM<sub>2.5</sub>.

---

|       | Median | Mean±SD       | <i>p</i> value among seasons | <i>p</i> value among cities |
|-------|--------|---------------|------------------------------|-----------------------------|
| HULIS | 0.45   | 1.25±1.56     | 0.032                        | 0.013                       |
| NMR1  | 40.450 | 44.67±19.407  | 0.003                        | 0.021                       |
| NMR2  | 29.305 | 35.594±17.399 | 0.003                        | 0.025                       |
| NMR3  | 53.750 | 60.523±28.273 | 0.036                        | 0.009                       |
| NMR4  | 6.910  | 9.932±8.055   | 0.001                        | 0.177                       |

---

168 \*µg/m<sup>3</sup>. # Kruskal–Wallis test. HULIS, humic-like  
169 substances; NMR, nuclear magnetic resonance.  
170  
171

172 Table S4. PCA results of the water-soluble inorganic ions, water-soluble elements,  
 173 HULIS, non-HULIS, endotoxin, and NMR1-4. Five factors were obtained, which  
 174 accounted for 76.28% of the total variance. Values below 0.5 are not shown.  
 175

|                               | PCA1 | PCA2 | PCA3  | PCA4  | PCA5  |
|-------------------------------|------|------|-------|-------|-------|
| Na                            | .947 |      |       |       |       |
| Cl                            | .945 |      |       |       |       |
| NMR1                          | .887 |      |       |       |       |
| NMR2                          | .869 |      |       |       |       |
| K                             | .812 |      |       |       |       |
| NMR3                          | .795 |      |       |       |       |
| Zn                            | .783 |      |       |       |       |
| NO <sub>3</sub> <sup>-</sup>  | .775 |      |       |       |       |
| NH <sub>4</sub> <sup>+</sup>  | .763 |      | -.537 |       |       |
| Mg                            | .760 |      | .558  |       |       |
| Mn                            | .756 |      |       |       |       |
| NMR4                          | .744 |      |       |       |       |
| SO <sub>4</sub> <sup>2-</sup> | .741 |      |       |       |       |
| Endotoxin                     | .719 |      |       |       |       |
| Co                            | .623 | .569 |       |       |       |
| Ti                            | .600 |      |       |       |       |
| Cu                            | .578 | .624 |       |       |       |
| Cr                            | .577 | .521 |       |       |       |
| Ca                            | .518 |      | .517  |       |       |
| As                            | .513 |      |       | .545  |       |
| Al                            |      | .541 |       |       |       |
| V                             |      |      |       | -.559 |       |
| Fe                            |      | .715 |       |       |       |
| Ni                            |      |      |       | -.676 |       |
| Cd                            |      |      |       | .636  |       |
| Pb                            |      | .586 | .589  |       |       |
| HULIS                         |      |      |       |       | -.676 |
| Non-HULIS                     |      |      |       |       | .551  |

176  
 177  
 178

179  
180

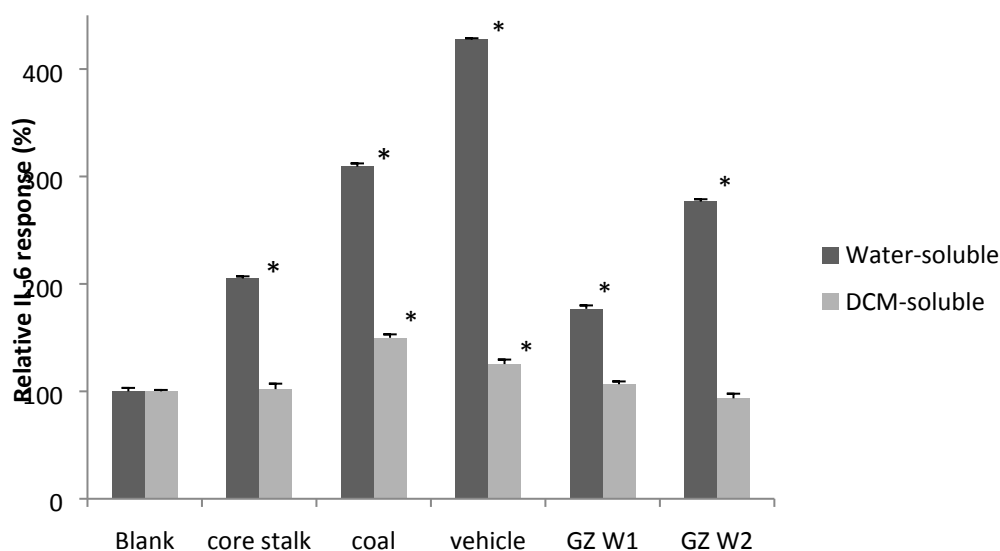

181  
182  
183  
184  
185  
186  
187  
188  
189  
190  
191  
192  
193  
194

Figure S1. IL-6 response in A549 cells exposed to the dichloromethane (DCM) and WSF of PM<sub>2.5</sub> samples from the same volume of air. GZ W1 and GZ W2 are the PM<sub>2.5</sub> from Guangzhou sample 1 and sample 2 in the winter of 2013, respectively; core stalk and coal are PM<sub>2.5</sub> from the combustion of core stalks and coal, respectively; and vehicle represents PM<sub>2.5</sub> from vehicle emissions. Cell were exposed in WSF from same volume of 10 m<sup>3</sup> air for 3 days. \**p* < 0.05, ANOVA. Each experimental sample was compared with its respective sample blank, which was considered as 100%.

195  
196

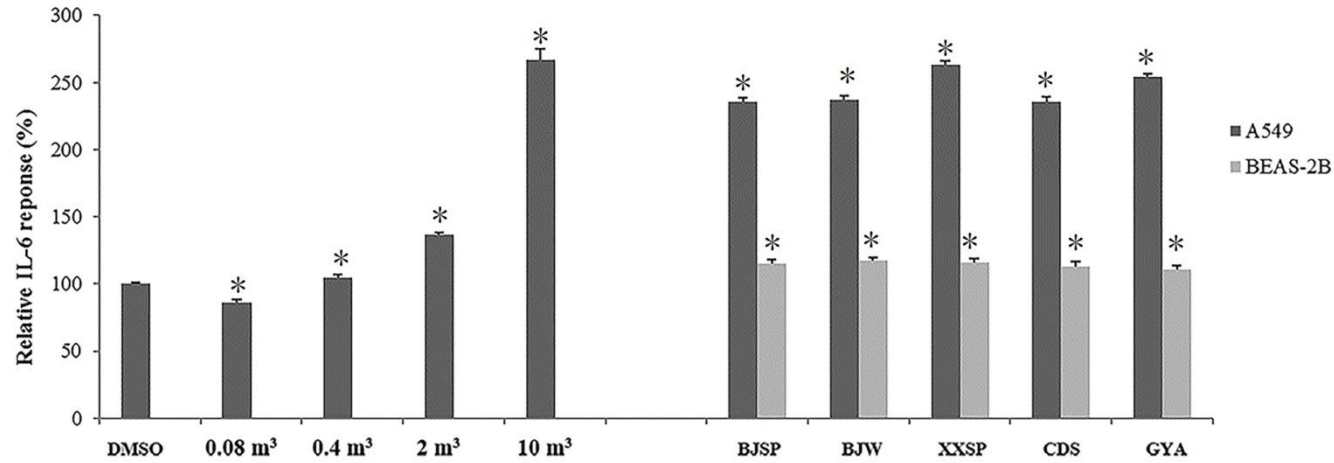

197  
198  
199  
200  
201  
202  
203  
204  
205  
206

Figure S2. Confirmation of PM<sub>2.5</sub> induced IL-6 release. Left: Relative IL-6 response at various WSF concentrations of the Xinxiang spring (XXSP) samples. A549 cells were exposed to various WSF concentrations (from PM<sub>2.5</sub> of 0.08-10 m<sup>3</sup> air) of the XXSP PM<sub>2.5</sub> for 3 days, and IL-6 levels were assessed. Right: Relative IL-6 response in Beas-2B and A549 cells exposed for 3 days to the WSFs of five PM<sub>2.5</sub> samples derived from 10 m<sup>3</sup> of air. Blank samples were used as the control, which was considered as 100%. \**p* < 0.05, ANOVA. The concentration of IL-6 in blank sample is 22.38±0.13 pg/ml in left figure, 43.26±0.56 pg/ml in right figure for A549 cells, and 3.67 ±0.89 ng/ml for Beas-2B cells.

207

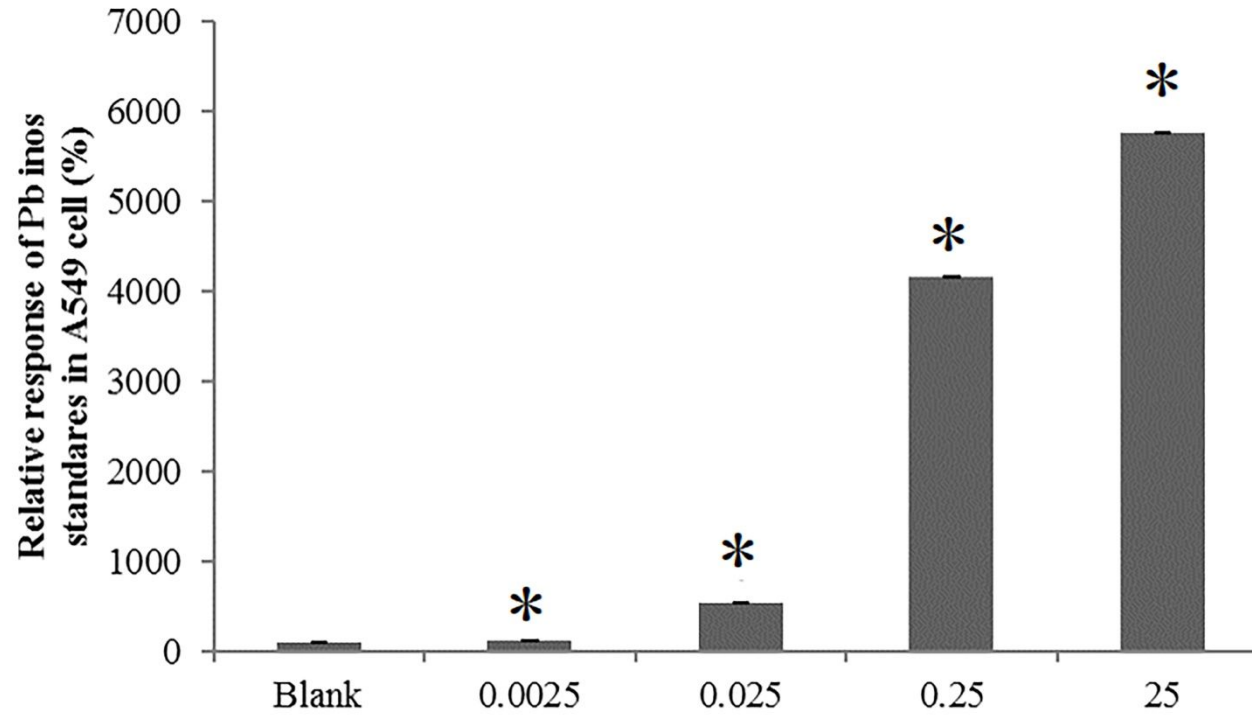

208

209

210

211

212

213

214

Figure S3. Relative IL-6 response in A549 cells exposed to various concentrations of Pb. A549 cells were exposed in Pb standard ions (0-25 ppm) for 3 days. Dimethyl sulfoxide-treated cells were used as the control, which was considered as 100%. \* $p < 0.05$ , ANOVA.

215

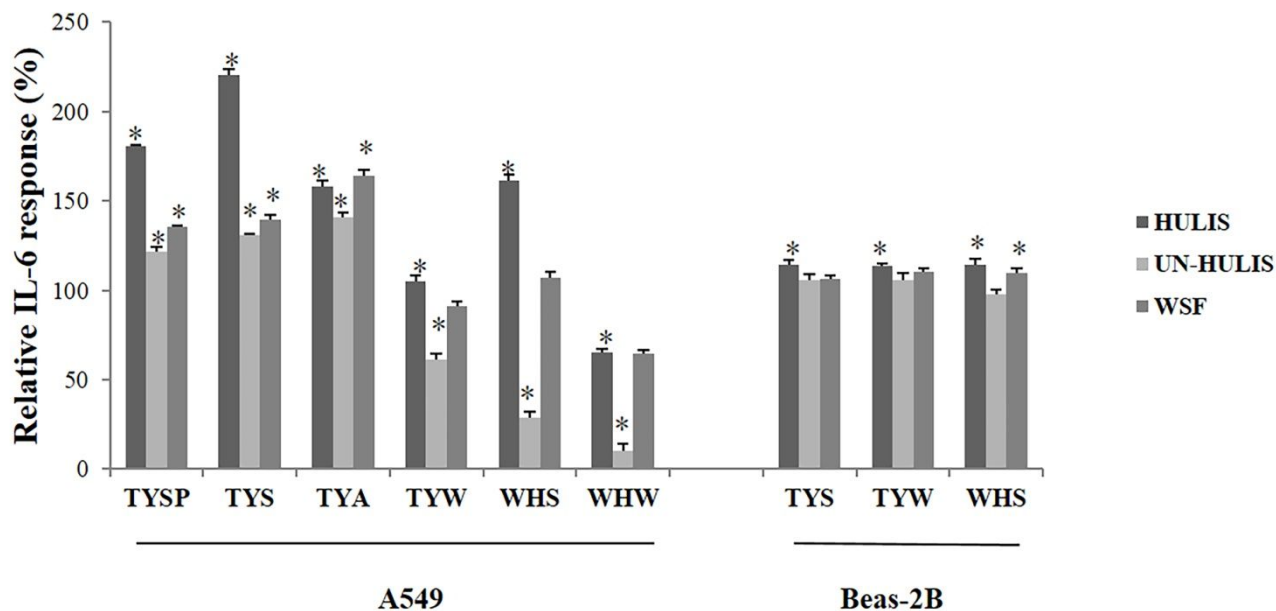

216

217

218

219 Figure S4. Relative IL-6 response of humic-like substances (HULIS), non-HULIS, and the WSFs of PM<sub>2.5</sub> samples. Samples included Taiyuan  
220 spring (TYSP), Taiyuan summer (TYS), Taiyuan Autumn (TYA), Taiyuan Winter (TYW), Wuhan summer (WHS), and Wuhan winter (WHW)  
221 PM<sub>2.5</sub>. A549 cells and Beas-2B cells were exposed at concentrations of 3.12 µg/cm<sup>2</sup>. Quartz filter sample blanks underwent the same treatment as  
222 the HULIS, non-HULIS, and WSF extraction methods, and the IL-6 responses of the blanks were considered as 100%. \* *p* < 0.05, ANOVA.

223



224  
225

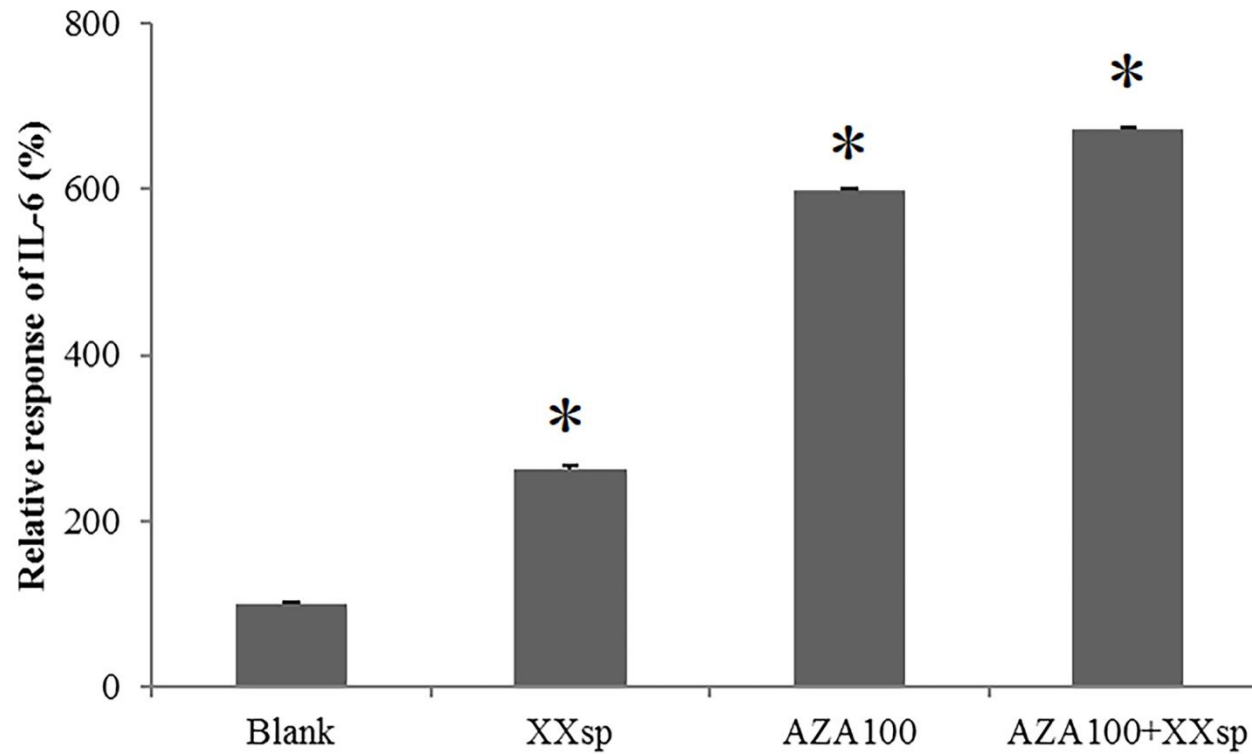

226  
227  
228  
229  
230  
231  
232

Figure S5. The DNA methylation inhibitor 5-aza-2'-deoxycytidine (AZA) enhanced PM<sub>2.5</sub>-induced IL-6 release in A549 cells. A549 cells were treated with 100  $\mu$ M AZA for 3 days and then exposed to the WSF of XXSP PM<sub>2.5</sub>. The IL-6 levels in cells exposed to blank samples treated the same as the PM<sub>2.5</sub> samples, which were considered as 100%. \* $p < 0.05$ , ANOVA.

233  
234

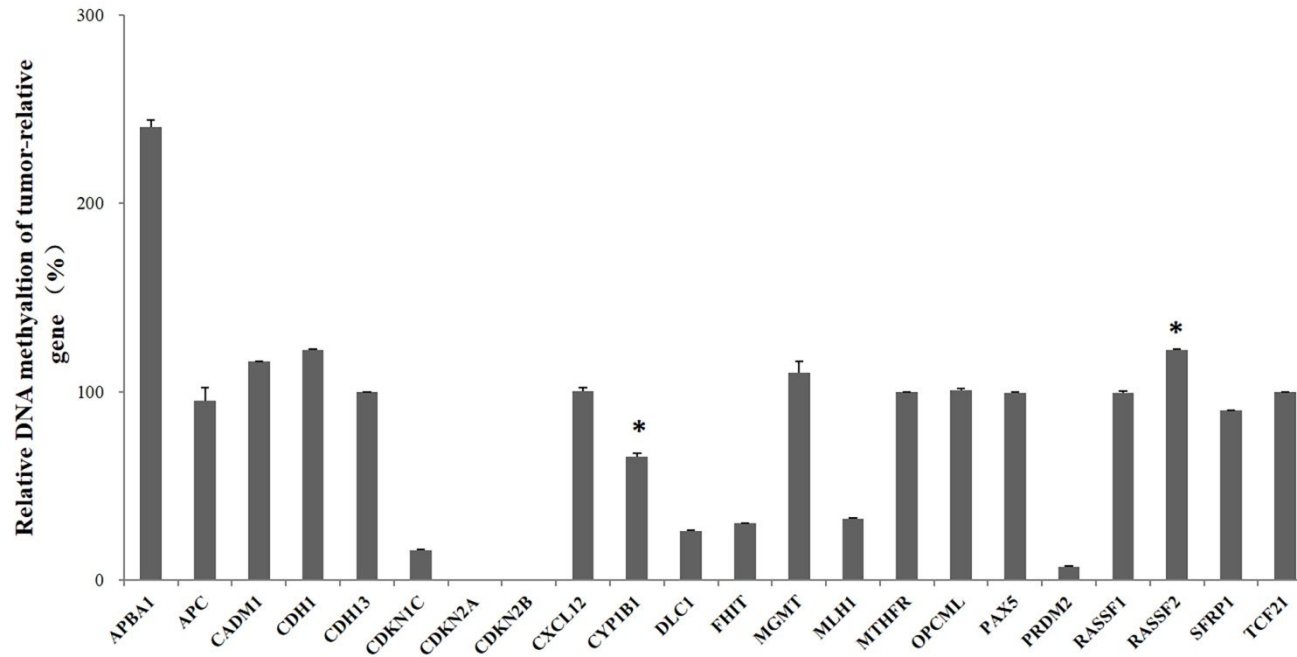

235  
236  
237  
238  
239

Figure S6. Relative DNA methylation of 22 tumor-related genes in A549 cells exposed to the WSF of Xinxiang Spring (XXSP) PM<sub>2.5</sub>. Blank samples were used as the control, which was considered as 100%. \* $p < 0.05$ , ANOVA.

---

240 REFERENCES

241

242 (1) Zeng L.; Ma H.; Pan S.; You J.; Zhang G.; Yu Z.; Sheng G.; Fu J. LINE-1 gene hypomethylation and p16 gene hypermethylation in HepG2  
243 cells induced by low-dose and long-term triclosan exposure: The role of hydroxyl group. *Toxicol. In Vitro.* 2016, 34, 35-44.

244

245 (2) Jiménez-Garza, O.; Guo, L.; Byun, H.M.; Carrieri, M.; Bartolucci, G.B.; Zhong, J.; Baccarelli A.A. Promoter methylation status in genes  
246 related with inflammation, nitrosative stress and xenobiotic metabolism in low-level benzene exposure: Searching for biomarkers of  
247 oncogenesis. *Food Chem. Toxicol.* 2017, 109, 669-676.

248

249
